# Supplementary material for: Efficacy of FFP3 respirators for prevention of SARS-CoV-2 infection in healthcare workers
Source: eLife journal article supplement (doi:10.7554/elife.71131), 2021-11-08
Supplement: supp [file elife-71131-supp-v1.zip]

Archive with 12 entries (12 files):
- elife_poa_e71131_Figure_1_figure_supplement_1.pdf
- elife_poa_e71131_Figure_1_figure_supplement_2.pdf
- elife_poa_e71131_Figure_2_figure_supplement_1.pdf
- elife_poa_e71131_Figure_3_figure_supplement_1.pdf
- elife_poa_e71131_Figure_3_figure_supplement_2.pdf
- elife_poa_e71131_Supplementary_file_1.docx
- elife_poa_e71131_Transparent_Reporting_File.docx
- elife_poa_e71131_Figure_1_source_data_1.xlsx
- elife_poa_e71131_Figure_1_figure_supplement_1_source_data_1.xlsx
- elife_poa_e71131_Figure_3_source_data_1.xlsx
- elife_poa_e71131_Figure_3_source_data_1.xlsx
- elife_poa_e71131_Figure_3_figure_supplement_2_source_data_2.xlsx
