# Supplementary material for: Efficacy of FFP3 respirators for prevention of SARS-CoV-2 infection in healthcare workers
Source: eLife journal article supplement (doi:10.7554/elife.71131), 2021-11-08
Supplement: supp [file elife-71131-supp-v1.zip › elife_poa_e71131_Figure_1_figure_supplement_1_source_data_1.xlsx]

## Sheet: Sheet1
	Symptomatic	Asymptomatic
Red	0.777778	0.222222
Green	0.760563	0.239437
