# Supplementary material for: Efficacy of FFP3 respirators for prevention of SARS-CoV-2 infection in healthcare workers
Source: eLife journal article supplement (doi:10.7554/elife.71131), 2021-11-08
Supplement: supp [file elife-71131-supp-v1.zip › elife_poa_e71131_Figure_1_source_data_1.xlsx]

## Sheet: Sheet1
Raw case numbers for the East of England region during the period of study
Area Type	Area Name	Area Code	Date	New cases by date	Weekly sum of cases
region	East of England	E12000006	2021-01-17	3011
region	East of England	E12000006	2021-01-16	3006
region	East of England	E12000006	2021-01-15	4471
region	East of England	E12000006	2021-01-14	4589	31341
region	East of England	E12000006	2021-01-13	4907	32065
region	East of England	E12000006	2021-01-12	5227	33124
region	East of England	E12000006	2021-01-11	6130	33881
region	East of England	E12000006	2021-01-10	3735	35093
region	East of England	E12000006	2021-01-09	4065	36433
region	East of England	E12000006	2021-01-08	5228	38441
region	East of England	E12000006	2021-01-07	5801	41663
region	East of England	E12000006	2021-01-06	6247	44429
region	East of England	E12000006	2021-01-05	7235	47652
region	East of England	E12000006	2021-01-04	9352	46446
region	East of England	E12000006	2021-01-03	6501	47120
region	East of England	E12000006	2021-01-02	7288	49626
region	East of England	E12000006	2021-01-01	4022	53511
region	East of England	E12000006	2020-12-31	6475	50110
region	East of England	E12000006	2020-12-30	8753	50158
region	East of England	E12000006	2020-12-29	11120	48606
region	East of England	E12000006	2020-12-28	5951	46320
region	East of England	E12000006	2020-12-27	6549	44180
region	East of England	E12000006	2020-12-26	5736	41282
region	East of England	E12000006	2020-12-25	1736	36518
region	East of England	E12000006	2020-12-24	4335	37259
region	East of England	E12000006	2020-12-23	5855	35301
region	East of England	E12000006	2020-12-22	6356	32961
region	East of England	E12000006	2020-12-21	6692	36360
region	East of England	E12000006	2020-12-20	4591	36645
region	East of England	E12000006	2020-12-19	3396	35505
region	East of England	E12000006	2020-12-18	5135	33485
region	East of England	E12000006	2020-12-17	4620	31219
region	East of England	E12000006	2020-12-16	4715	29375
region	East of England	E12000006	2020-12-15	4336	28224
region	East of England	E12000006	2020-12-14	4426	25781
region	East of England	E12000006	2020-12-13	2747	23475
region	East of England	E12000006	2020-12-12	2245	21013
region	East of England	E12000006	2020-12-11	2692	18765
region	East of England	E12000006	2020-12-10	2314	16535
region	East of England	E12000006	2020-12-09	2253	15089
region	East of England	E12000006	2020-12-08	2088	14031
region	East of England	E12000006	2020-12-07	2196	12718
region	East of England	E12000006	2020-12-06	1301	11742
region	East of England	E12000006	2020-12-05	1187	10927
region	East of England	E12000006	2020-12-04	1379	10122
region	East of England	E12000006	2020-12-03	1338	9441
region	East of England	E12000006	2020-12-02	1438	8908
region	East of England	E12000006	2020-12-01	1283	8528
region	East of England	E12000006	2020-11-30	1515	8280
region	East of England	E12000006	2020-11-29	768	7970
region	East of England	E12000006	2020-11-28	807	7735
region	East of England	E12000006	2020-11-27	1131	7481
region	East of England	E12000006	2020-11-26	1028	7203
region	East of England	E12000006	2020-11-25	1203	7238
region	East of England	E12000006	2020-11-24	1029	7233
region	East of England	E12000006	2020-11-23	1237	7158
region	East of England	E12000006	2020-11-22	803	7307
region	East of England	E12000006	2020-11-21	802	7354
region	East of England	E12000006	2020-11-20	1056	7642
region	East of England	E12000006	2020-11-19	1177	7998
region	East of England	E12000006	2020-11-18	1250	8108
region	East of England	E12000006	2020-11-17	1317	8289
region	East of England	E12000006	2020-11-16	1593	8594
region	East of England	E12000006	2020-11-15	913	8794
region	East of England	E12000006	2020-11-14	983	9153
region	East of England	E12000006	2020-11-13	1361	9293
region	East of England	E12000006	2020-11-12	1377	9499
region	East of England	E12000006	2020-11-11	1609	9666
region	East of England	E12000006	2020-11-10	1457	9690
region	East of England	E12000006	2020-11-09	1799	9438
region	East of England	E12000006	2020-11-08	1080	9176
region	East of England	E12000006	2020-11-07	1007	8612
region	East of England	E12000006	2020-11-06	1109	8301
region	East of England	E12000006	2020-11-05	1115	7876
region	East of England	E12000006	2020-11-04	1045	7432
region	East of England	E12000006	2020-11-03	1146	7147
region	East of England	E12000006	2020-11-02	1374	7030
region	East of England	E12000006	2020-11-01	636	6889
region	East of England	E12000006	2020-10-31	722	6863
region	East of England	E12000006	2020-10-30	992	6653
region	East of England	E12000006	2020-10-29	974	6423
region	East of England	E12000006	2020-10-28	1019
region	East of England	E12000006	2020-10-27	936
region	East of England	E12000006	2020-10-26	1144
