# Supplementary material for: Efficacy of FFP3 respirators for prevention of SARS-CoV-2 infection in healthcare workers
Source: eLife journal article supplement (doi:10.7554/elife.71131), 2021-11-08
Supplement: supp [file elife-71131-supp-v1.zip › elife_poa_e71131_Figure_3_figure_supplement_2_source_data_2.xlsx]

## Sheet: Red Wards
Week	Observed cases	Modelled cases
1	0	0.931898
2	2	0.951343
3	1	1.96599
4	1	2.31437
5	3	2.28853
6	5	2.36127
7	1	2.59183
8	3	2.79265
9	2	1.99556
10	4	3.70908
11	5	5.25014

## Sheet: Green Wards
Week	Observed cases	Modelled cases
1	5	6.19283
2	7	6.80927
3	3	7.29533
4	5	6.5668
5	6	6.23014
6	10	7.17786
7	7	10.182
8	10	16.4002
9	20	18.2304
10	34	22.2991
11	33	16.7268

## Sheet: Critical Care Wards
Week	Observed cases	Modelled cases
1	1	0.871855
2	0	1.06908
3	1	1.28939
4	1	1.08564
5	0	0.977731
6	3	1.28152
7	1	2.24445
8	3	4.23765
9	3	5.05752
10	2	6.84981
11	0	5.9341

## Sheet: Ratio r2 r1
Cutoff	Low	Inferred	High
3	0	0.217371	1.11766
4	0	0.108082	0.94974
5	0	0.0581274	0.732009
6	0	3.46899e-08	0.583197
7	0	1.09179e-08	0.325203
