# Supplementary material for: Efficacy of FFP3 respirators for prevention of SARS-CoV-2 infection in healthcare workers
Source: eLife journal article supplement (doi:10.7554/elife.71131), 2021-11-08
Supplement: supp [file elife-71131-supp-v1.zip › elife_poa_e71131_Figure_3_source_data_1.xlsx]

## Sheet: Ratio r2 r1
Cutoff	Low	Inferred	High
3	0	6.60483e-08	0.693538
4	0	4.85196e-08	0.598253
5	0	8.57777e-08	0.478172
6	0	6.30194e-08	0.416508
7	0	6.38098e-08	0.288699
