# Supplementary material for: Efficacy of FFP3 respirators for prevention of SARS-CoV-2 infection in healthcare workers
Source: eLife journal article supplement (doi:10.7554/elife.71131), 2021-11-08
Supplement: supp [file elife-71131-supp-v1.zip › elife_poa_e71131_Figure_3_source_data_1.xlsx]

## Sheet: Figure 3A Green Wards
Week	Observed cases	Modelled cases
1	5	4.89336
2	7	5.78883
3	3	6.60237
4	5	5.6124
5	6	5.1326
6	10	6.48329
7	7	10.7647
8	10	19.6269
9	20	22.3791
10	34	28.3565
11	33	20.8293

## Sheet: Figure 3B Red Wards
Week	Observed cases	Modelled cases
1	0	0.903674
2	2	0.931387
3	1	1.94433
4	1	2.26759
5	3	2.23077
6	5	2.33443
7	1	2.66303
8	3	3.07218
9	2	2.58877
10	4	4.92504
11	5	6.87607

## Sheet: Figure 3C Risks
Week	Green ward risk	Red ward risk	Community risk
1	0.000253275	0.00797111	0.00125006
2	0.000253275	0.00797111	0.00153285
3	0.000253275	0.00797111	0.00184872
4	0.000253275	0.00797111	0.00155659
5	0.000253275	0.00797111	0.00140187
6	0.000253275	0.00797111	0.00183743
7	0.000253275	0.00797111	0.00321809
8	0.000253275	0.00797111	0.00607593
9	0.000253275	6.83743e-10	0.00725145
10	0.000253275	6.83743e-10	0.00975255
11	0.000253275	6.83743e-10	0.00810857

## Sheet: Figure 3D P(Comm)
Week	Low bound	Inferred	High bound
1	0.481312	0.831525	1
2	0.532242	0.858198	1
3	0.578474	0.879507	1
4	0.536067	0.860059	1
5	0.509955	0.846977	1
6	0.57698	0.878857	1
7	0.704913	0.927039	1
8	0.81852	0.959983	1
9	0.84333	0.966251	1
10	0.878633	0.974687	1
11	0.857532	0.969711	1

## Sheet: Figure 3E Red P(Comm)
Week	Low bound	Inferred	High bound
1	0.0761232	0.135564	0.267065
2	0.0917635	0.161285	0.308823
3	0.108619	0.188264	0.350177
4	0.0930526	0.163376	0.312113
5	0.0845856	0.149565	0.290089
6	0.108028	0.18733	0.348784
7	0.174995	0.287607	0.484013
8	0.285961	0.432542	0.639127
9	0.66622	1	1
10	0.728587	1	1
11	0.690586	1	1
