# Supplementary figures and images for: Efficacy of FFP3 respirators for prevention of SARS-CoV-2 infection in healthcare workers
Source: eLife journal article supplement (doi:10.7554/elife.71131), 2021-11-08

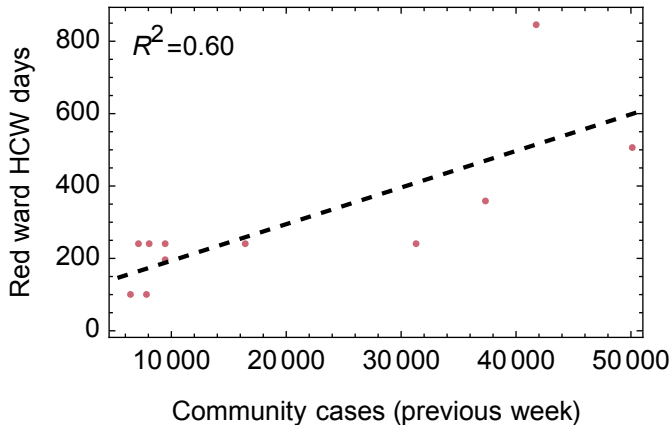

Supplement: supp [file elife-71131-supp-v1.zip]

Red wards

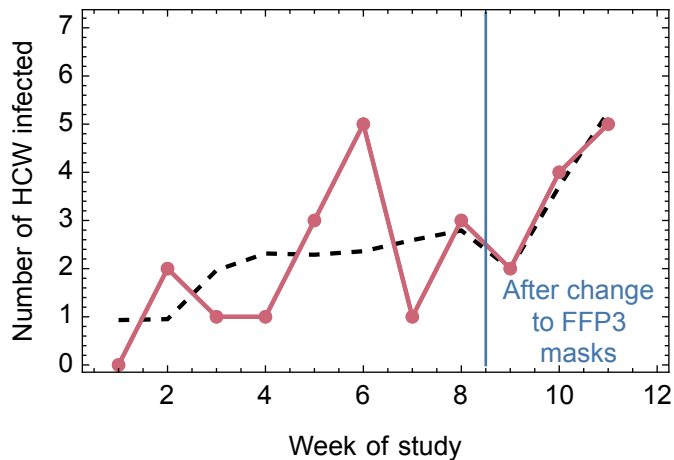

Green wards

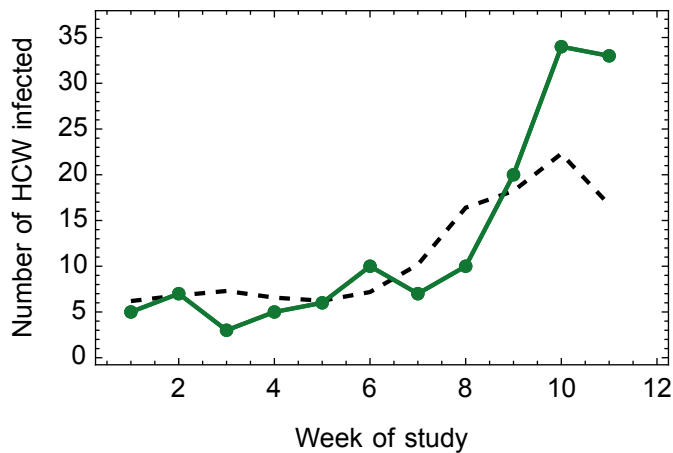

Critical wards

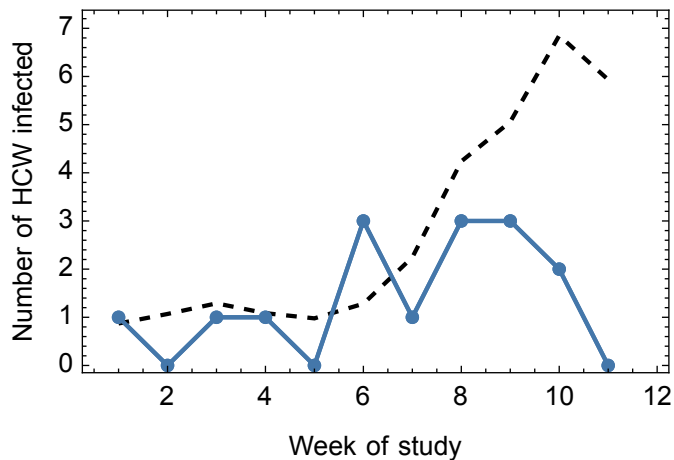

With critical care wards

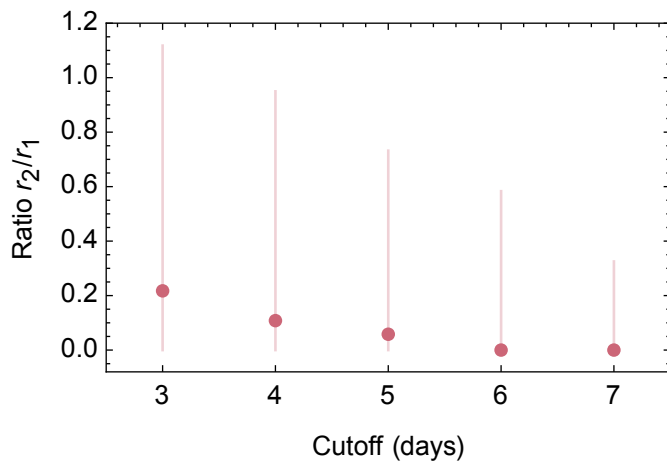

Supplement: supp [file elife-71131-supp-v1.zip]

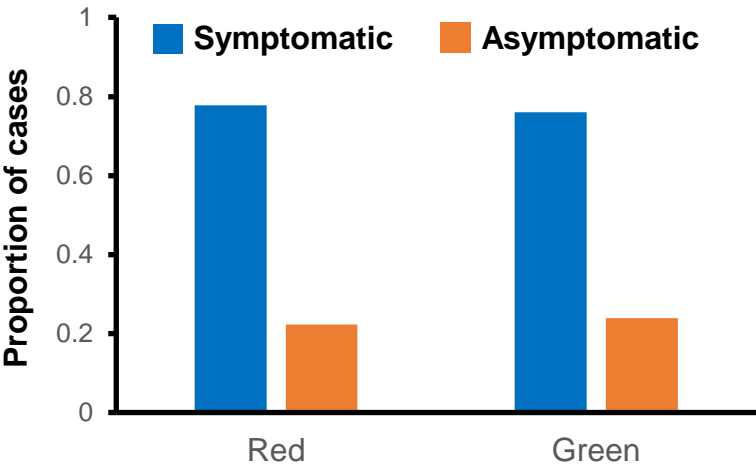

Supplement: supp [file elife-71131-supp-v1.zip › elife_poa_e71131_Figure_1_figure_supplement_1.pdf]

A

Green wards

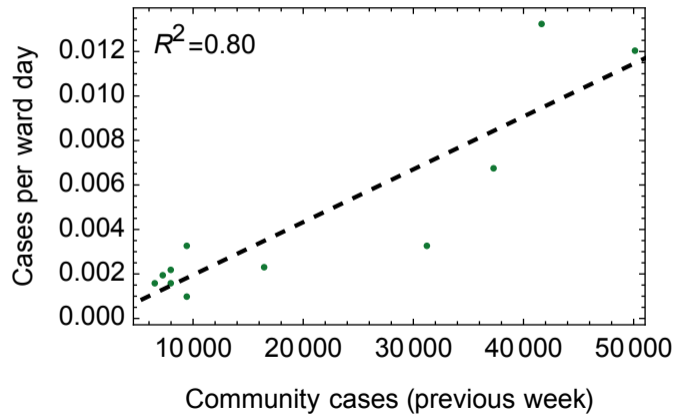

B

Red wards

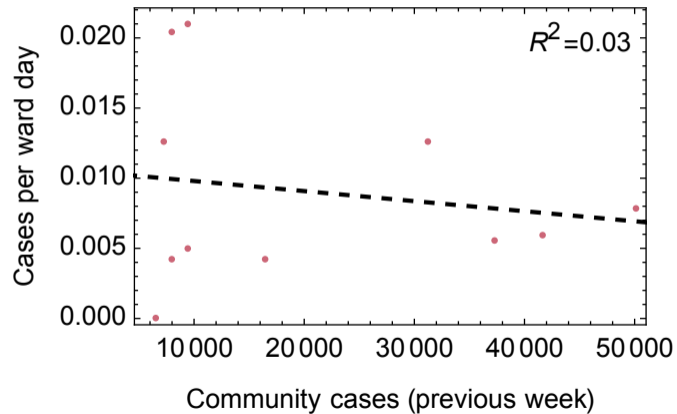

Supplement: supp [file elife-71131-supp-v1.zip › elife_poa_e71131_Figure_2_figure_supplement_1.pdf]

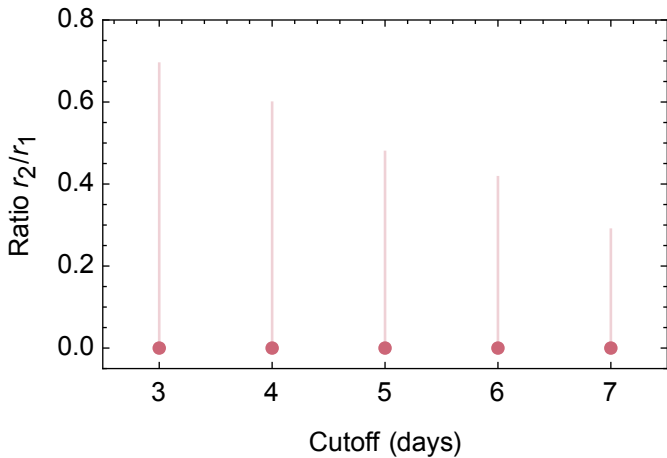

Supplement: supp [file elife-71131-supp-v1.zip › elife_poa_e71131_Figure_3_figure_supplement_1.pdf]
